# Supplementary material for: Electron Tomography Imaging of Surface Glycoproteins on Human Parainfluenza Virus 3: Association of Receptor Binding and Fusion Proteins before Receptor Engagement
Source: PubMed Central journal article supplement — mBio. 2015 Feb 17;6(1):e02393-14. doi: 10.1128/mBio.02393-14 (PMC4337575; doi:10.1128/mbio.02393-14), 2015-02-17

## Lateral view of glycoproteins of HPIV3 virus

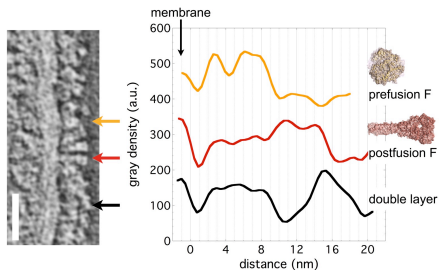

## Cryo electron tomograms

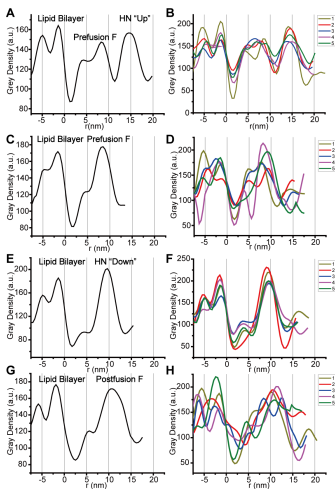

## Negative stain electron tomograms

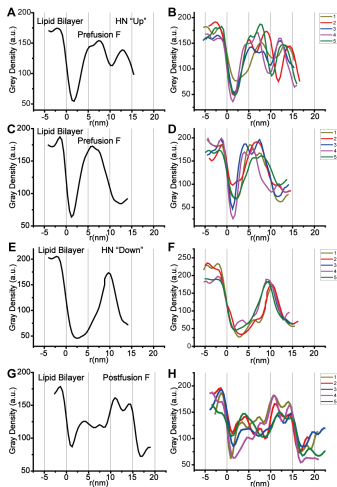

Supplement: mbo001152164sf2.pdf [file mbo001152164sf2.pdf]
