# Supplementary figures and images for: Electron Tomography Imaging of Surface Glycoproteins on Human Parainfluenza Virus 3: Association of Receptor Binding and Fusion Proteins before Receptor Engagement
Source: PubMed Central journal article supplement — mBio. 2015 Feb 17;6(1):e02393-14. doi: 10.1128/mBio.02393-14 (PMC4337575; doi:10.1128/mbio.02393-14), 2015-02-17

**A**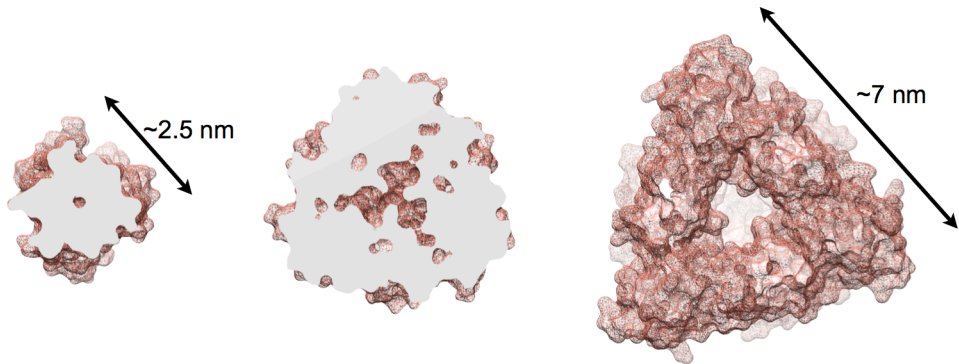**B**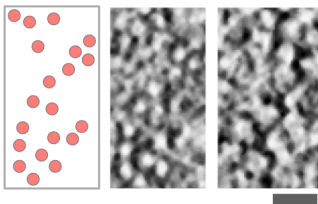**C**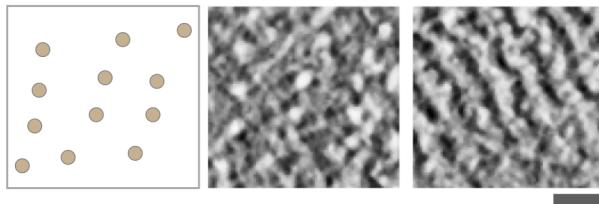**D**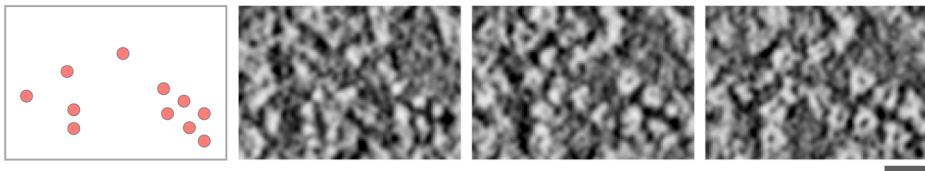**E**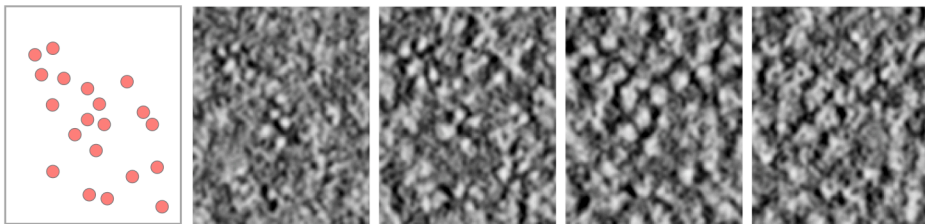**F**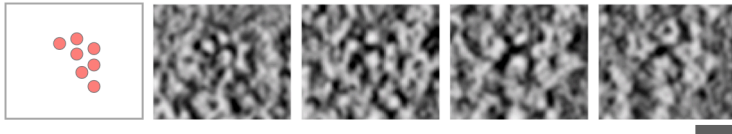

Supplement: mbo001152164sf1.pdf [file mbo001152164sf1.pdf]
